# Supplementary material for: An urchin-like Ni3ZnC0.7–carbon nanotube-porous carbon composite derived from metal–organic gel as a cathode material for rechargeable Li–O2 batteries
Source: Royal Society of Chemistry journal article supplement (doi:10.1039/c6ra08218a), 2016-01-01
Supplement: c6ra08218a1.pdf [file c6ra08218a1.pdf]

## † Supplementary Information

### **Urchin-like $\text{Ni}_3\text{ZnC}_{0.7}$ -carbon nanotubes-porous carbon composite derived from metal-organic gel as a cathode material for rechargeable $\text{Li-O}_2$ batteries**

Yanqing Lai, Wei Chen, Zhian Zhang\*, Yongqing Gan, Jie Li

*School of Metallurgy and Environment, Central South University, Changsha, Hunan, 410083, China*

*Email: zhangzhian@csu.edu.cn; Tel: +86 731 88830649*

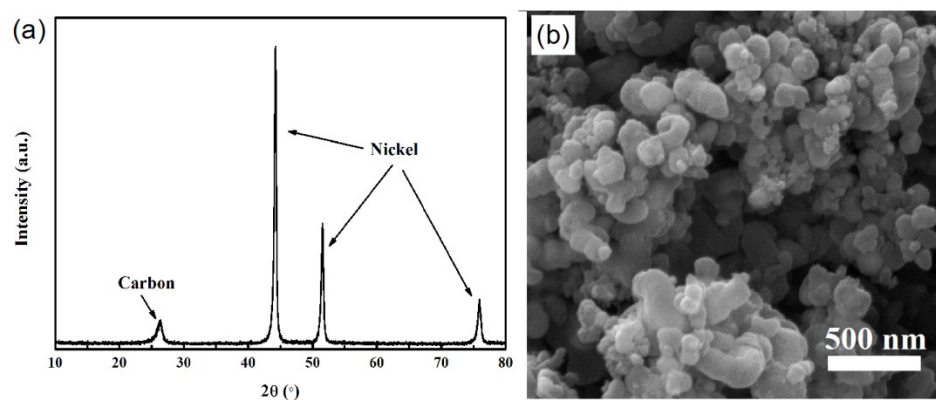

**Fig. S1** (a) XRD pattern of NC composite that was synthesized by carbonizing the gel (MOG-N, which was prepared in the absence of  $\text{Zn}^{2+}$ ), (b) SEM image of NC

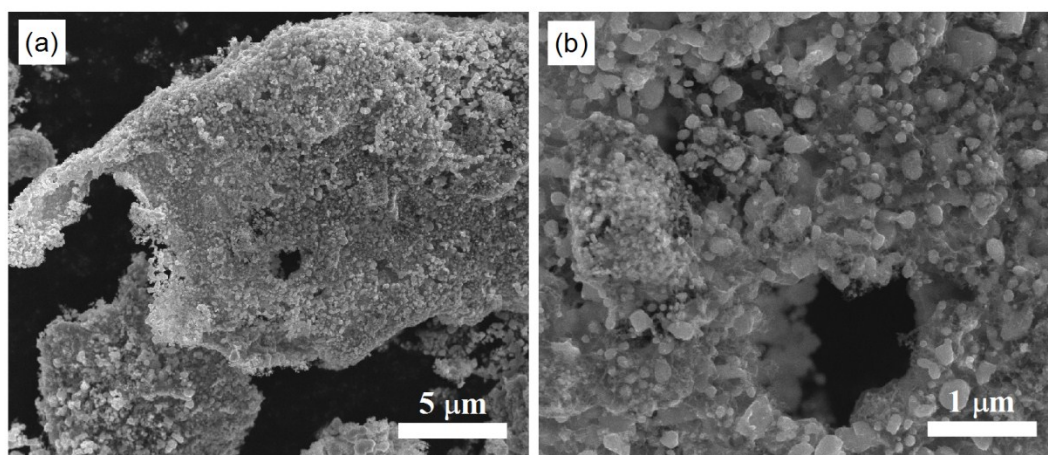

**Fig. S2** SEM images of NZCD composite that was synthesized by carbonizing the drying MOG-NZ.
